# Supplementary material
Source: ML conference proceedings conference paper supplement (https://openreview.net/forum?id=wmO7z57wNK)
Supplement: supplementary_material [file attachment]

## A More Results

In this section, we report more results in our LLMCBench. The results for the first compression performance track are shown in Table 7. We also observe that quantization approaches have higher overall metrics on Vicuna, which is similar to the observation in our main paper.

For track 2 the generalization ability track, we report INT8 quantization results in Table 8. For track 3 the training consumption track, we report full results in Table 4. We also show the results of training consumption on Vicuna-7B in Table 9. For track 4 the inference consumption track, we report more results in Table 10. For track 5 the hardware acceleration track, we report full results in Table 5, and the results on Vicuna-7B are shown in Table 11. For track 6 the trustworthiness track, we report full results in Table 6 and the results on Vicuna-7B in Table 12.

## B Evaluation Model Selection

We choose LLaMA2 and LLaMA3 as the baseline models for evaluation in tracks 1, 3, 4, 5, 6. The reason is that the mainstream LLMs include: LLaMA [26], LLaMA2 [27], LLaMA3, Vicuna [35], OPT [34], and ChatGLM [4]. Among these models, LLaMA2, LLaMA3, Vicuna, and ChatGLM are recently proposed and their performances are promising. The structure of LLaMA2, Vicuna, and ChatGLM are similar, and most compression approaches are tested on LLaMA-like models in their own experiments. Therefore, we choose the most representative one LLaMA2 as one of our baseline model. As LLaMA3 has recently been proposed and achieves state-of-the-art performance, we also choose LLaMA3 as the baseline model in our evaluation.

Table 4: Full results of Track 3: Training consumption in our LLMCBench.

| Method       | Model     | Sparsity/#Bits | Training time                        | GPU memory | OM <sub>train</sub> |
|--------------|-----------|----------------|--------------------------------------|------------|---------------------|
| Sparsity     |           |                |                                      |            |                     |
| LLM-Pruner   | LLaMA2-7B | 50%            | 0.5min (sparsity) + 121min (retrain) | 33.79G     | 1.77                |
|              | LLaMA3-8B | 50%            | 0.5min (sparsity) + 183min (retrain) | 37.61G     |                     |
| Wanda        | LLaMA2-7B | 50%            | 4min                                 | 26.96G     | 43.78               |
|              | LLaMA3-8B | 50%            | 10min                                | 31.58G     |                     |
| Wanda        | LLaMA2-7B | 2:4            | 4min                                 | 26.96G     | 42.14               |
|              | LLaMA3-8B | 2:4            | 9min                                 | 31.58G     |                     |
| SparseGPT    | LLaMA2-7B | 50%            | 16min                                | 25.80G     | 11.47               |
|              | LLaMA3-8B | 50%            | 33min                                | 31.35G     |                     |
| SparseGPT    | LLaMA2-7B | 2:4            | 17min                                | 25.80G     | 11.03               |
|              | LLaMA3-8B | 2:4            | 33min                                | 31.35G     |                     |
| Quantization |           |                |                                      |            |                     |
| GPTQ         | LLaMA2-7B | INT8           | 17min                                | 26.36G     | 13.28               |
|              | LLaMA3-8B | INT8           | 19min                                | 40.31G     |                     |
| SmoothQuant  | LLaMA2-7B | INT8           | 7min                                 | 13.51G     | 39.45               |
|              | LLaMA3-8B | INT8           | 15min                                | 15.96G     |                     |
| AWQ          | LLaMA2-7B | INT8           | 12min                                | 11.70G     | 19.73               |
|              | LLaMA3-8B | INT8           | 10min                                | 20.10G     |                     |
| OmniQuant    | LLaMA2-7B | INT8           | 325min                               | 29.45G     | 1.08                |
|              | LLaMA3-8B | INT8           | 307min                               | 30.61G     |                     |

Table 5: Full results of Track 5: Hardware Acceleration in our LLMCBench.

| Method                  | Model     | Sparsity/#Bits | Tokens/s     |        |         | OM <sub>hard</sub> |
|-------------------------|-----------|----------------|--------------|--------|---------|--------------------|
|                         |           |                | TensorRT-LLM | vLLM   | MLC-LLM |                    |
| Sparsity                |           |                |              |        |         |                    |
| Dense                   | LLaMA2-7B | 0              | 95.62        | 85.86  | 107.45  | 100                |
|                         | LLaMA3-8B | 0              | 79.65        | 77.42  | 91.83   |                    |
| Structured sparsity     | LLaMA2-7B | 50%            | 145.28       | 129.61 | 155.29  | 146.97             |
|                         | LLaMA3-8B | 50%            | 116.03       | 115.31 | 128.01  |                    |
| Structured 2:4 sparsity | LLaMA2-7B | 2:4            | 120.51       | 85.94  | 107.44  | 106.56             |
|                         | LLaMA3-8B | 2:4            | 88.07        | 78.21  | 90.91   |                    |
| Unstructured sparsity   | LLaMA2-7B | 50%            | 96.15        | 85.85  | 107.29  | 100.11             |
|                         | LLaMA3-8B | 50%            | 79.76        | 77.86  | 91.43   |                    |
| Quantization            |           |                |              |        |         |                    |
| Full-Precision          | LLaMA2-7B | FP16           | 95.62        | 85.86  | 107.45  | 100                |
|                         | LLaMA3-8B | FP16           | 79.65        | 77.42  | 91.83   |                    |
| Quantization            | LLaMA2-7B | INT8           | 150.42       | 115.48 | 154.27  | 146.25             |
|                         | LLaMA3-8B | INT8           | 126.12       | 112.32 | 125.80  |                    |
| Quantization            | LLaMA2-7B | INT4           | 182.29       | 152.46 | 186.19  | 180.74             |
|                         | LLaMA3-8B | INT4           | 153.39       | 145.97 | 146.55  |                    |

Table 6: Full results of Track 6: Model Trustworthiness in our LLMCBench.

| Method         | Model     | Sparsity/#Bits | Robustness | Truthfulness | OM <sub>trust</sub> |
|----------------|-----------|----------------|------------|--------------|---------------------|
| Sparsity       |           |                |            |              |                     |
| Dense          | LLaMA2-7B | 0              | 39.01      | 44.77        | 100                 |
|                | LLaMA3-8B | 0              | 46.52      | 56.21        |                     |
| LLM-Pruner     | LLaMA2-7B | 50%            | 39.72      | 43.79        | 94.09               |
|                | LLaMA3-8B | 50%            | 46.05      | 42.37        |                     |
| Wanda          | LLaMA2-7B | 50%            | 36.71      | 39.27        | 87.32               |
|                | LLaMA3-8B | 50%            | 41.61      | 43.36        |                     |
| Wanda          | LLaMA2-7B | 2:4            | 36.63      | 41.95        | 90.95               |
|                | LLaMA3-8B | 2:4            | 44.10      | 45.34        |                     |
| SparseGPT      | LLaMA2-7B | 50%            | 36.67      | 41.53        | 88.88               |
|                | LLaMA3-8B | 50%            | 41.43      | 44.35        |                     |
| SparseGPT      | LLaMA2-7B | 2:4            | 37.92      | 38.70        | 88.41               |
|                | LLaMA3-8B | 2:4            | 42.72      | 43.22        |                     |
| Quantization   |           |                |            |              |                     |
| Full-Precision | LLaMA2-7B | FP16           | 39.01      | 44.77        | 100                 |
|                | LLaMA3-8B | FP16           | 46.52      | 56.21        |                     |
| GPTQ           | LLaMA2-7B | INT8           | 38.75      | 42.66        | 97.22               |
|                | LLaMA3-8B | INT8           | 46.51      | 52.94        |                     |
| SmoothQuant    | LLaMA2-7B | INT8           | 40.18      | 45.62        | 98.35               |
|                | LLaMA3-8B | INT8           | 45.49      | 50.71        |                     |
| AWQ            | LLaMA2-7B | INT8           | 38.84      | 42.80        | 97.51               |
|                | LLaMA3-8B | INT8           | 46.46      | 53.36        |                     |
| OmniQuant      | LLaMA2-7B | INT8           | 39.02      | 45.20        | 99.55               |
|                | LLaMA3-8B | INT8           | 46.72      | 54.38        |                     |

Table 7: More results on compression performance track evaluated on Vicuna-7B. H.S. means HellaSwag.

| Method       | Sparsity<br>/#Bits | Knowledge ability |       |       | Inference ability |       |       |       |       |       |
|--------------|--------------------|-------------------|-------|-------|-------------------|-------|-------|-------|-------|-------|
|              |                    | MMLU              | ARC-c | ARC-e | H.S.              | PIQA  | Wino  | QNLI  | MNLI  | Wiki↓ |
| Sparsity     |                    |                   |       |       |                   |       |       |       |       |       |
| Dense        | 0                  | 48.80             | 45.90 | 71.21 | 73.81             | 77.97 | 69.53 | 57.17 | 53.55 | 6.33  |
| LLM-Pruner   | 50%                | 24.01             | 29.35 | 48.65 | 47.32             | 66.16 | 54.85 | 49.59 | 34.84 | 23.98 |
| Wanda        | 50%                | 40.98             | 42.75 | 68.43 | 69.64             | 74.65 | 67.80 | 54.42 | 54.11 | 7.95  |
|              | 2:4                | 25.99             | 35.49 | 60.44 | 57.80             | 71.44 | 62.43 | 50.61 | 37.03 | 13.44 |
| SparseGPT    | 50%                | 41.87             | 41.98 | 66.62 | 69.79             | 75.68 | 67.01 | 55.36 | 53.91 | 7.94  |
|              | 2:4                | 34.46             | 37.20 | 62.46 | 61.24             | 72.85 | 66.22 | 51.23 | 47.32 | 11.99 |
| Quantization |                    |                   |       |       |                   |       |       |       |       |       |
| Full Prec.   | FP16               | 48.80             | 45.90 | 71.21 | 73.81             | 77.97 | 69.53 | 57.17 | 53.55 | 6.33  |
| GPTQ         | INT8               | 48.70             | 45.90 | 71.34 | 73.70             | 78.02 | 69.69 | 56.65 | 53.75 | 6.33  |
| SmoothQuant  | INT8               | 47.11             | 44.45 | 70.29 | 72.23             | 75.41 | 67.64 | 51.75 | 42.71 | 6.61  |
| AWQ          | INT8               | 41.97             | 45.65 | 71.13 | 73.81             | 78.13 | 69.61 | 58.00 | 53.75 | 6.29  |
| OmniQuant    | INT8               | 48.71             | 44.88 | 71.25 | 73.69             | 77.80 | 69.22 | 56.49 | 53.16 | 6.35  |

Table 8: Generalization ability performance of different 8-bit quantization methods.

| Model       | Dense  | GPTQ   | SmoothQuant | AWQ    | OmniQuant |
|-------------|--------|--------|-------------|--------|-----------|
| LLaMA-7B    | 5.68   | 5.68   | 5.72        | 5.68   | 5.69      |
| LLaMA-13B   | 5.09   | 5.09   | 5.12        | 5.09   | 5.09      |
| LLaMA-30B   | 4.10   | 4.10   | 4.20        | 4.10   | 4.12      |
| LLaMA-65B   | 3.53   | 3.53   | 3.66        | 3.53   | 3.53      |
| LLaMA2-7B   | 5.12   | 5.12   | 5.51        | 5.12   | 5.13      |
| LLaMA2-13B  | 4.57   | 4.57   | 4.92        | 4.57   | 4.59      |
| LLaMA2-70B  | 3.12   | 3.12   | 3.18        | 3.12   | 3.38      |
| LLaMA3-8B   | 5.54   | 5.54   | 5.64        | 6.14   | 2349.16   |
| LLaMA3-70B  | 2.59   | 2.59   | 2.97        | 2.59   | 22202.36  |
| Vicuna-7B   | 6.33   | 6.34   | 6.83        | 6.34   | 6.35      |
| Vicuna-13B  | 5.57   | 5.57   | 6.12        | 5.57   | 5.59      |
| OPT-1.3B    | 14.62  | 15.76  | 14.79       | 14.61  | 14.89     |
| OPT-2.7B    | 12.47  | 12.48  | 12.51       | 12.47  | 12.48     |
| OPT-6.7B    | 10.86  | 10.86  | 10.87       | 10.86  | 10.86     |
| OPT-13B     | 10.13  | 10.13  | 10.15       | 10.13  | 11.55     |
| OPT-30B     | 9.56   | 9.56   | 9.59        | 9.56   | 12.55     |
| ChatGLM2-6B | 105.58 | 106.02 | 640.33      | 106.08 | 957.51    |
| ChatGLM3-6B | 6.21   | 6.22   | 6.89        | 6.22   | 6.37      |

Table 9: Training consumption of different LLM compression methods evaluated on Vicuna-7B.

| Method              | Sparsity/#Bits | Training time                        | GPU memory |
|---------------------|----------------|--------------------------------------|------------|
| <b>Sparsity</b>     |                |                                      |            |
| LLM-Pruner          | 50%            | 0.5min (sparsity) + 120min (retrain) | 33.79G     |
| Wanda               | 50%            | 4min                                 | 26.96G     |
|                     | 2:4            | 4min                                 | 26.96G     |
| SparseGPT           | 50%            | 16min                                | 25.80G     |
|                     | 2:4            | 15min                                | 25.80G     |
| <b>Quantization</b> |                |                                      |            |
| GPTQ                | INT8           | 16min                                | 26.36G     |
| SmoothQuant         | INT8           | 6min                                 | 13.51G     |
| AWQ                 | INT8           | 10min                                | 11.70G     |
| OmniQuant           | INT8           | 332min                               | 29.45G     |

Table 10: Inference consumption of different compression methods tested on Vicuna-7B.

| Method              | Sparsity/#Bits | GPU Memory | Model Size | #MACs |
|---------------------|----------------|------------|------------|-------|
| <b>Sparsity</b>     |                |            |            |       |
| Dense               | 0              | 22.96G     | 12.55G     | 0.85T |
| LLM-Pruner          | 50%            | 13.31G     | 6.75G      | 0.51T |
| Wanda               | 50%            | 22.96G     | 12.55G     | 0.43T |
|                     | 2:4            | 22.96G     | 12.55G     | 0.43T |
| SparseGPT           | 50%            | 22.96G     | 12.55G     | 0.43T |
|                     | 2:4            | 22.96G     | 12.55G     | 0.43T |
| <b>Quantization</b> |                |            |            |       |
| Full-Precision      | FP16           | 22.96G     | 12.55G     | 0.85T |
| GPTQ                | INT8           | 15.16G     | 6.67G      | 0.23T |
| SmoothQuant         | INT8           | 23.62G     | 12.55G     | 0.23T |
| AWQ                 | INT8           | 15.15G     | 6.71G      | 0.23T |
| OmniQuant           | INT8           | 15.13G     | 6.53G      | 0.23T |

Table 11: Hardware acceleration of different LLM compression methods on Vicuna-7B.

| Method                  | Sparsity/#Bits | Tokens/s     |        |         |
|-------------------------|----------------|--------------|--------|---------|
|                         |                | TensorRT-LLM | vLLM   | MLC-LLM |
| Sparsity                |                |              |        |         |
| Dense                   | 0              | 95.62        | 85.93  | 107.45  |
| Structured sparsity     | 50%            | 131.75       | 130.89 | 155.19  |
| Structured 2:4 sparsity | 2:4            | 120.08       | 85.72  | 107.33  |
| Unstructured sparsity   | 50%            | 95.98        | 85.35  | 107.37  |
| Quantization            |                |              |        |         |
| Full-Precision          | FP16           | 95.62        | 85.86  | 107.45  |
| Quantization            | INT8           | 151.10       | 122.28 | 155.16  |
| Quantization            | INT4           | 185.09       | 167.84 | 186.78  |

Table 12: Trustworthiness of different LLM compression methods on Vicuna-7B.

| Method              | Sparsity/#Bits | Robustness | Truthfulness |
|---------------------|----------------|------------|--------------|
| <b>Sparsity</b>     |                |            |              |
| Dense               | 0              | 50.46      | 55.51        |
| LLM-Pruner          | 50%            | 51.62      | 44.21        |
| Wanda               | 50%            | 44.96      | 52.54        |
|                     | 2:4            | 41.35      | 45.62        |
| SparseGPT           | 50%            | 46.32      | 53.25        |
|                     | 2:4            | 42.40      | 45.48        |
| <b>Quantization</b> |                |            |              |
| Full-Precision      | FP16           | 50.46      | 55.51        |
| GPTQ                | INT8           | 50.44      | 52.81        |
| SmoothQuant         | INT8           | 51.37      | 53.11        |
| AWQ                 | INT8           | 50.48      | 52.80        |
| OmniQuant           | INT8           | 50.46      | 52.80        |
